# Supplementary material
Source: MDPI journal article supplement (https://www.mdpi.com/1424-2818/14/12/1032)
Supplement: s1 [file s1]

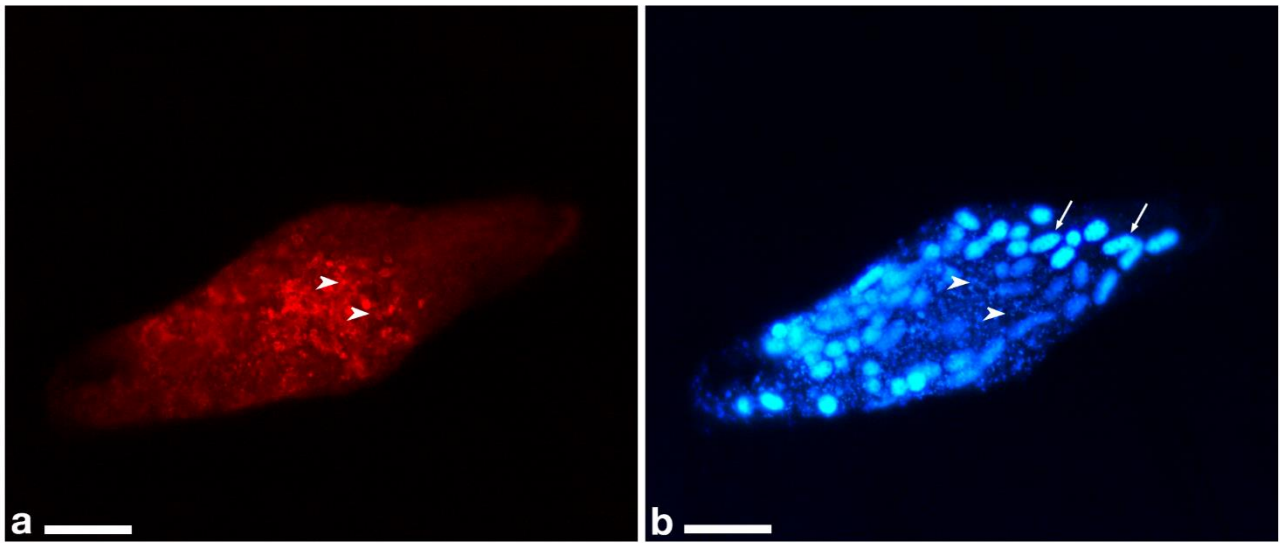

**Supplementary Figure S1.** Fluorescence *in situ* hybridisation pictures of *Pseudokeronopsis* cfr. *erythrina* PSqRJ01. A) Cell showing positive signals of probe ALF1b inside the cytoplasm, highlighting the “*Ca. Trichorickettsia*” bacteria; B) The same cell after DAPI (4',6-diamidino-2-phenylindole) staining, highlighting bacteria inside the cytoplasm (arrowheads) and several macronuclear beads (arrows). Bars stand for 20  $\mu\text{m}$ .
